# Supplementary material
Source: PubMed Central journal article supplement (PMC2836961)
Supplement: E09-08-0655_1.pdf [file E09-08-0655_1.pdf]

[i] PDE3A inhibition

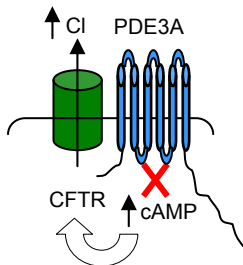

PDE3A inhibition increases compartmentalized cAMP at the plasma membrane. The increased cAMP activates CFTR channel function

[ii] PKA activation

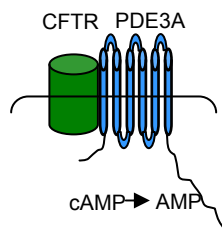

PKA activation clusters PDE3A and CFTR into microdomains and removes excess cAMP thus maintaining a high specificity

[iii] Cytoskeleton disruption

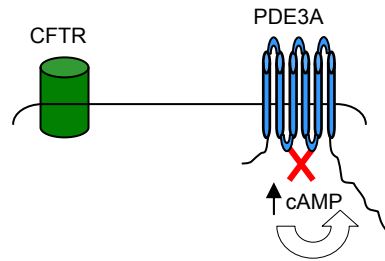

Cytoskeleton disruption scatters CFTR and PDE3A away from each other. Therefore, PDE3A inhibition no longer activates CFTR in compartmentalized fashion

**Supplemental Figure S1.** Pictorial representation of molecular mechanism of PDE3A coupling to CFTR chloride channel function.

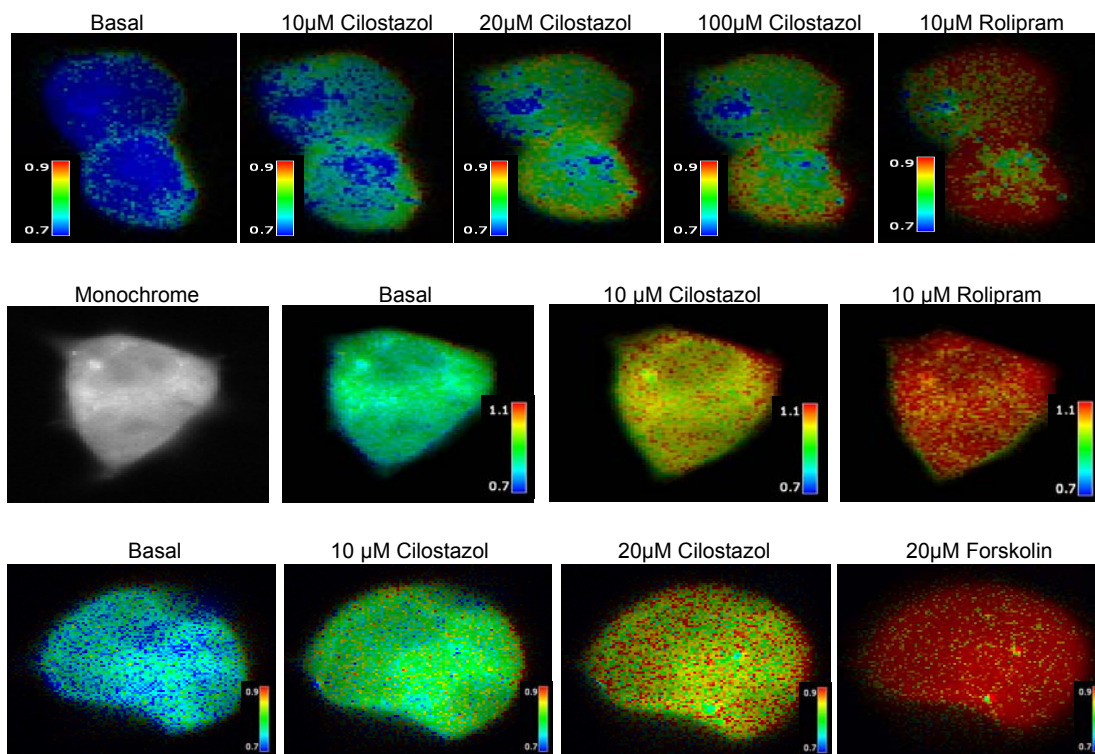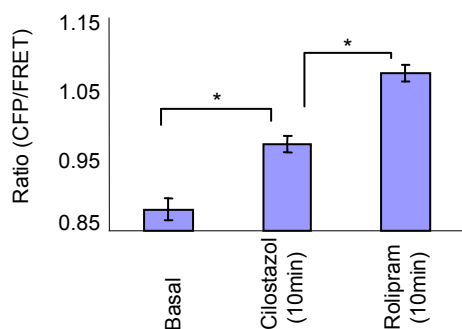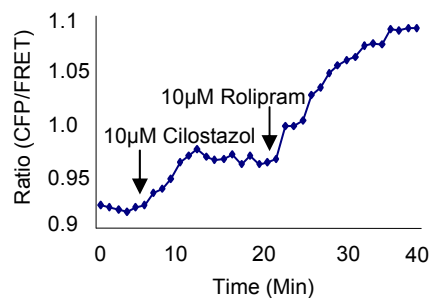

**Supplemental Figure S2.** Representative pseudocolor images of CFP/FRET emission ratio before (time = 0 min) and after addition of 10-20 μM PDE3 and PDE4 inhibitors cilostazol and rolipram (time = 10 min). Forskolin (20 μM) was added at the end of the experiment to monitor global cAMP response.

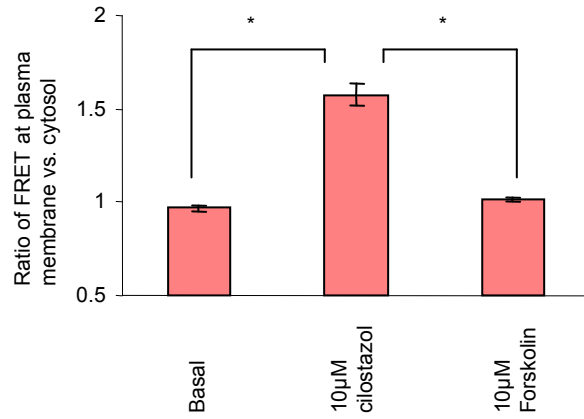

**Supplemental Figure S3.** Ratio of FRET at the plasma membrane vs. cytosol in Calu-3 cells (mean  $\pm$  SEM,  $n=5$ ,  $*p<0.001$ ) indicates compartmentalized distribution of cAMP upon PDE3 inhibition

A

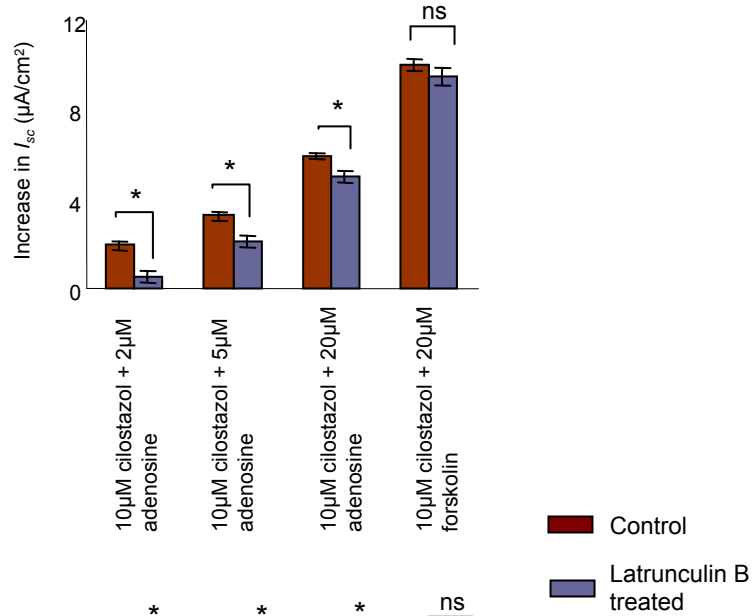

B

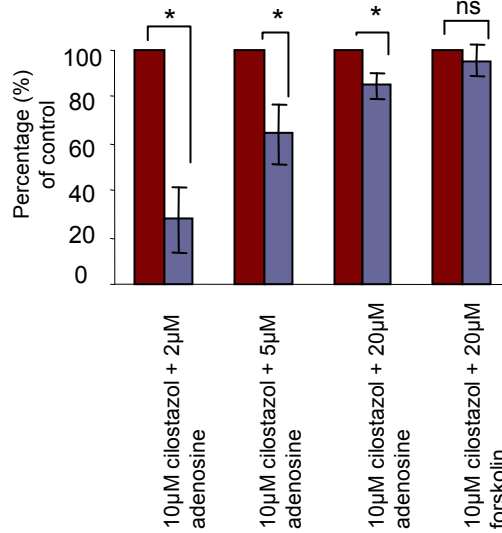

**Supplemental Figure S4.** (A) Adenosine mediated CFTR short-circuit currents ( $I_{sc}$ ) in the presence of PDE3 inhibitor cilostazol are significantly inhibited by actin cytoskeleton disruptor latrunculin B (mean  $\pm$  SEM,  $n=3$ ,  $*p<0.001$ ). (B) The data in Figure S4A is converted to percentage (%) of control where control is taken as maximal 100%. The bar graph shows averaged maximal  $I_{sc}$  after latrunculin B treatment as a percentage of the control. The data shows mean  $\pm$  SEM,  $n=3$ , ns: not significant.  $*p<0.001$  compared with control for each dose.

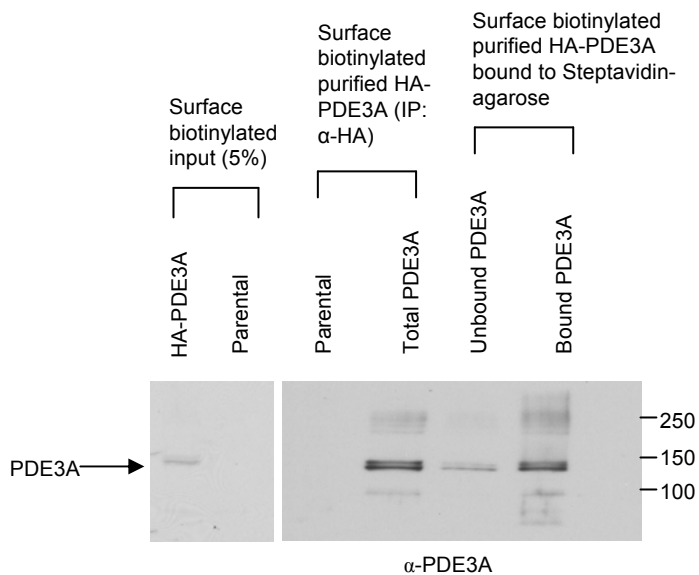

**Supplemental Figure S5.** Immunoblot for PDE3A expression on the plasma membrane of HEK293 cells expressing HA-PDE3A. Bound PDE3A clearly shows that about 90% of PDE3A is present at the plasma membrane.

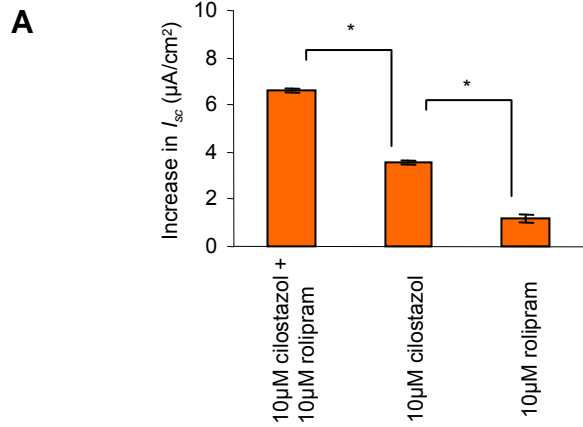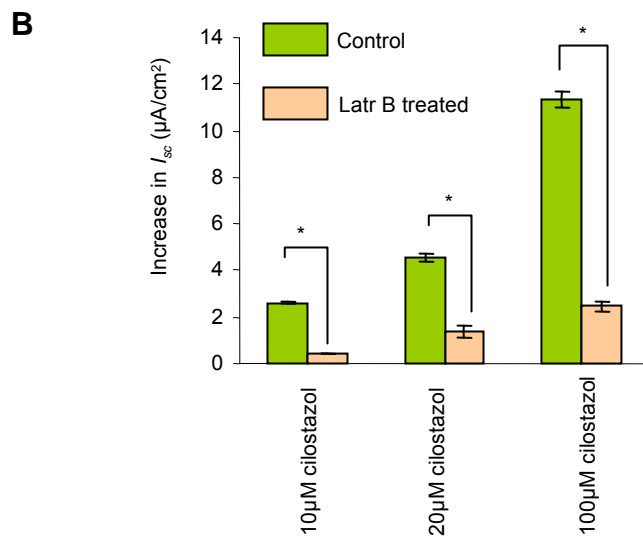

**Supplemental Figure S6.** (A) Quantification of Ussing chamber experimental data in Figure 2 (mean  $\pm$  SEM,  $n=3$ ,  $*p<0.001$ ). (B) Quantification of Ussing chamber experimental data in Figure 7 (mean  $\pm$  SEM,  $n=3$ ,  $*p<0.001$ ).
